# Supplementary material
Source: PubMed Central journal article supplement (PMC2151786)
Supplement: bjpg57-714TableS4.pdf [file bjpg57-714TableS4.pdf]

Supplementary Table 4. Cost of individual aspects of the intervention.

| Intervention                                                         | Group                       | Number of patients reviewed | Total cost <sup>d</sup> , £ | Cost per patient <sup>e</sup> , £ | Cost per patient reviewed <sup>f</sup> , £ | Saving per consultation telephone-option vs face-to-face only, £ |
|----------------------------------------------------------------------|-----------------------------|-----------------------------|-----------------------------|-----------------------------------|--------------------------------------------|------------------------------------------------------------------|
| Cost of the full review service <sup>a</sup>                         | Telephone option (n = 598)  | 397                         | 3982.23                     | 6.66                              | 10.03                                      |                                                                  |
|                                                                      | Face-to-face only (n = 654) | 352                         | 4485.50                     | 6.86                              | 12.74                                      | 2.71                                                             |
|                                                                      | Usual care (n = 557)        | 282                         | 3340.41                     | 6.00                              | 11.85                                      |                                                                  |
| Cost of the recall and booked review service <sup>b</sup>            | Telephone option (n = 598)  | 276                         | 3402.75                     | 5.69                              | 12.33                                      |                                                                  |
|                                                                      | Face-to-face only (n = 654) | 324                         | 4458.82                     | 6.82                              | 13.76                                      | 1.43                                                             |
|                                                                      | Usual care (n = 557)        | 256                         | 3322.98                     | 5.97                              | 12.98                                      |                                                                  |
| Cost of providing opportunistic calls to non-responders <sup>c</sup> | Telephone-option (n = 322)  | 110                         | 579.47                      | 1.80                              | 5.27                                       |                                                                  |
|                                                                      | Face-to-face only (n = 330) | 6                           | 26.67                       | 0.08                              | 4.45                                       | -0.82                                                            |
|                                                                      | Usual care (n = 301)        | 5                           | 17.43                       | 0.06                              | 3.49                                       |                                                                  |

<sup>a</sup>The cost of the full review service delivered according to allocation. <sup>b</sup>Cost of recall administration, plus nursing costs for providing booked reviews. Cost of those who did not attend (DNAs) is included, but not abortive calls. <sup>c</sup>Cost of providing the opportunistic telephone reviews to non-responders. This includes abortive calls, but no recall administrative costs. <sup>d</sup>Costs calculated as in Supplementary Tables 1 and 2. <sup>e</sup>Cost is expressed per patient targeted: that is, the whole active asthma population for the full review service and recall and booked component of the service, but only the non-responders were targeted by the opportunistic telephone calls. <sup>f</sup>Cost is expressed per patient reviewed as a result of that component of the service: that is, all patients reviewed for the full review service, responders for the recall and booked component of the service, and those reviewed opportunistically for the opportunistic telephone service.
